# The effects of electroencephalogram feature-based transcranial alternating current stimulation on working memory and electrophysiology

1

2 **Lanting Zeng<sup>1†</sup>, Mingrou Guo<sup>1†</sup>, Ruoling Wu<sup>1,2</sup>, Yu Luo<sup>3</sup>, Pengfei Wei<sup>1,3,4\*</sup>**

3 <sup>1</sup>Shenzhen Key Laboratory of Neuropsychiatric Modulation and Collaborative Innovation Center for  
4 Brain Science, Guangdong Provincial Key Laboratory of Brain Connectome and Behavior, CAS  
5 Center for Excellence in Brain Science and Intelligence Technology, Brain Cognition and Brain  
6 Disease Institute, Shenzhen Institute of Advanced Technology, Chinese Academy of Sciences,  
7 Shenzhen–Hong Kong Institute of Brain Science, Shenzhen Fundamental Research Institutions,  
8 Shenzhen, 518055, China

9 <sup>2</sup>Department of bioengineering, Imperial College London, SW7 2AZ, United Kingdom

10 <sup>3</sup>Shenzhen Zhongkehuayi Technology Co.,Ltd

11 <sup>4</sup>University of Chinese Academy of Sciences, Beijing, 100049, China

12 <sup>†</sup>These authors have contributed equally to this work and share first authorship

13 \* **Correspondence:**

14 Pengfei Wei

15 [pf.wei@siat.ac.cn](mailto:pf.wei@siat.ac.cn)

16 **Keywords: Electroencephalogram, transcranial alternating current stimulation, working**  
17 **memory, filter bank common spatial pattern, theta oscillations**

18

19 **Abstract**

20 Transcranial alternating current stimulation (tACS) can influence cognitive functions by modulating  
21 brain oscillations. However, results regarding the effectiveness of tACS in regulating cognitive  
22 performance have been inconsistent. In the present study, we aimed to find EEG characteristics  
23 associated with the improvements in working memory performance, to select tACS stimulus targets  
24 and frequency based on this feature, and to explore effects of selected stimulus on verbal working  
25 memory. To achieve this goal, we first investigated the EEG characteristics associated with  
26 improvements in working memory performance with the aid of EEG analyses and machine learning  
27 techniques. These analyses suggested that 8 Hz activity in the prefrontal region was related to  
28 accuracy in the verbal working memory task. The tACS stimulus target and pattern were then

29 selected based on the EEG feature. Finally, the selected tACS frequency (8 Hz tACS in the prefrontal  
30 region) was applied to modulate working memory. The performance of working memory was  
31 improved significantly using the selected stimulation than using 40 Hz and sham stimulation  
32 (Especially for participants with low verbal working memory). In conclusion, using EEG features  
33 related to positive behavioral changes to select brain regions and stimulation patterns for tACS is an  
34 effective intervention for improving working memory. Our results contribute to the groundwork for  
35 future tACS closed-loop interventions for cognitive deterioration.

## 36 **1 Introduction**

37 Over the past few decades, the development of non-invasive brain stimulation (NIBS) techniques has  
38 provided a new and effective approach to modulate memory for both researchers and clinicians  
39 (Misselhorn et al., 2020; Reinhart & Nguyen, 2019; Rombouts et al., 2005; Benussi et al., 2021;  
40 Grover et al., 2021). Among NIBS techniques, transcranial alternating current stimulation (tACS)  
41 can alter specific frequencies of brain oscillations in predefined brain regions and further modulate  
42 human cognition (Zaehle et al., 2010; Vosskuhl et al., 2015; Riddle et al., 2021). Working memory  
43 deterioration is a key feature of cognitive decline in old age (Li et al., 2001). Although some  
44 researchers have proposed that NIBS can help to regulate memory and attenuate age-related cognitive  
45 decline (Reinhart & Nguyen, 2019), results regarding the effectiveness of tACS in regulating  
46 working memory performance have been inconsistent. Given that verbal and visual working memory  
47 involve different cognitive structures, these inconsistencies may have been due to improper selection  
48 of stimulation targets and parameters. Therefore, in the current study, we want to select tACS  
49 stimulus targets and frequency based on the EEG characteristics associated with improvements in  
50 verbal working memory, and to explore the effect of selected stimulus on verbal working memory.

51 Several studies have indicated that theta and gamma tACS can improve verbal working memory.  
52 Based on the positive association between gamma band activity and task performance reported in  
53 previous studies, Hoy et al. (2015) applied 40 Hz tACS to the F3-contralateral supraorbital area in 18  
54 healthy participants. Participants underwent 20 min of tES (40 Hz or sham) while completing a  
55 verbal two-back task, as well as two-back and three-back tasks before and after tACS. Compared  
56 with sham-tACS and transcranial direct current stimulation (tDCS), 40 Hz tACS resulted in increased  
57 performance in terms of  $d'$  (an accuracy discriminability index). Biel et al. (2021) also recently  
58 reported that frontoparietal in-phase and in-phase focal theta tACS substantially improved verbal  
59 three-back task performance when compared with placebo stimulation.

60 However, some studies have reported that tACS was not effective or was only effective in a limited  
61 number of people for verbal working memory. For example, Pahor & Jaušovec (2018) applied tACS  
62 over many regions (F3-F4, F3-P3, F4-P4, P3-P4) in healthy adults to investigate working memory  
63 using two-back and three-back tasks. The rationale of the electrode montage and frequency band was  
64 based on previous correlational research, which showed that frontotemporal theta and gamma  
65 frequency bands are involved in working memory. Nevertheless, only theta-tACS improved  
66 performance on the three-back task in the F4-P4 region. In an earlier study, Vosskuhl et al. (2015)  
67 applied individual theta frequency stimulation at Pz-FPz. When compared with sham stimulation,  
68 tACS was associated with improved short-term memory performance. However, there was no  
69 significant difference in improvements on the verbal three-back task between tACS and sham  
70 stimulation. Kilian et al. (2020) further compared the effects of tDCS and 6-Hz tACS applied at F3-  
71 FP2 in healthy participants, reporting no significant difference in verbal n-back task performance  
72 among the experimental groups (sham, tDCS, and tACS), but they observed that tDCS and tACS  
73 exert different modulatory effects on fMRI-derived network dynamics.

74 In the abovementioned studies, stimulation targeted the prefrontal, frontal, and parietal lobes using  
75 theta and gamma frequencies. In NIBS studies, specific targets and parameters for stimulation are  
76 usually selected in the following two ways: (a) frequency bands and regions are determined based on  
77 previously reported findings regarding their association with verbal working memory or (b) the  
78 parameters are simply selected based on those used in previous studies. While these methods have  
79 been somewhat successful, there is no guarantee that each combination of parameters will regulate  
80 working memory.

81 We hypothesized that after identifying the brain regions and frequency bands associated with  
82 working memory, further exploration of changes in electroencephalogram (EEG) activity that  
83 correspond to positive behavioral changes can help to improve the effectiveness of tACS by enabling  
84 researchers to set stimulation targets and parameters based on such EEG activity. Repeated  
85 assessments of verbal working memory and EEG activity may therefore help to elucidate the  
86 electrophysiological features that vary with improvements in behavioral performance. To test this  
87 hypothesis, we conducted two experiments that mainly focused on working memory. Experiment 1  
88 was an EEG study, wherein participants completed three n-back tasks, and the electrophysiological  
89 features related to improvements in working memory were extracted. In Experiment 2, the  
90 participants were divided into three groups and received different frequencies of online tACS: the  
91 frequency in group 1 was the evident band in experiment 1, the frequency in group 2 was the non-  
92 evident band in experiment 1, and group 3 was the sham group. The results of the comparison  
93 between group 1 and the other groups can answer the research question.

## 94 **2 Experiment 1: EEG features related to performance**

### 95 **2.1 Materials and Methods**

#### 96 **2.1.1 Participants**

97 A total of 35 healthy adults aged 22–26 years of age participated in Experiment 1. All participants  
98 had normal or corrected-to-normal vision and were right-handed.

99 In experiment 1, ten participants were excluded because they did not complete the experiment and 25  
100 participants (five females; mean age  $23.76 \pm 1.14$  years) were included in the analyses.

101 When analyzing the results of Experiment 1, we considered that some volunteers would exhibit  
102 naturally high performance on the verbal working memory task, leading to a ceiling effect over  
103 multiple measurements that may impede identification of the EEG characteristics associated with  
104 improvements in performance. We also considered that individuals with high and low levels of  
105 verbal working memory ability may exhibit differences in EEG activity and that the same tES  
106 parameter may exert different modulatory effects in each group (Daffner et al., 2011, Tseng et al.,  
107 2012). For the behavioral analyses, participants were divided into two groups based on their  
108 performance in block 1. The grouping method was selected in reference to previous studies (Daffner  
109 et al., 2011, Tseng et al., 2012). The scores of the three-back and four-back tasks were summed. The  
110 participants who scored lower than the median scores were assigned to the low-performance group,  
111 while those who scored higher than the median scores were assigned to the high-performance group.  
112 Following grouping, four participants were excluded due to extreme values (target accuracy [target-  
113 ACC] or reaction time (RT) exceeding two standard deviations from the mean). The final low-  
114 performance group (LP) and high-performance groups (HP) included nine and 12 participants,  
115 respectively.

116 For the EEG analyses, two participants were excluded because they had not sufficient number of  
117 good quality EEG trials after artifact removal (LP group:  $n = 8$ ; HP group:  $n = 11$ ).

118 This study was approved by the Ethics Committee of the Shenzhen Institute of Advanced  
119 Technology. The experimental procedures conformed to the principles of the Declaration of Helsinki  
120 regarding human experimentation. All participants provided oral consent, signed informed consent  
121 documents, and received 270RMB for their participation.

## 122 **2.1.2 Experimental Design and Schedule**

123 In Experiment 1, all subjects received the same treatment. Participants were required to visit the  
124 laboratory twice to complete three n-Back tasks (blocks 1, 2, and 3). On day 1, participants  
125 performed the block 1 n-back task. After 1 week, the subjects returned to the laboratory and  
126 completed blocks 2 and 3. There was a 10 min break between blocks 2 and 3. In each task, task-state  
127 EEG data were recorded.

## 128 **2.1.3 N-back Task**

129 Kirchner (1958) first proposed the n-back task. Subsequently, the n-back task has been widely  
130 employed to investigate and measure working memory. In Experiment 1, we employed the two-back  
131 task as an exercise, and the three-back and four-back tasks to measure the working memory  
132 performance of volunteers. As illustrated in Figure 1, in n-Back task (e.g., two-back task), each trial  
133 started with a stimulus consisting of an uppercase letter presented for 2 s, followed by a fixation “+”  
134 for 0.5 s. After the  $n^{\text{th}}$  trial (e.g.,  $2^{\text{nd}}$  in the two-back task), participants were required to determine  
135 whether the current letter was the same as the previous  $n^{\text{th}}$  letter (e.g.,  $2^{\text{nd}}$  in the two-back task). If  
136 they were the same, the participants were required to press the ‘match’ button. The current trial was  
137 defined as a target trial. Otherwise, the participants pressed the ‘non-match’ button, and the current  
138 trial was defined as a non-target trial. The accuracy of the target trials is defined as “target-ACC”.  
139 For each trial, participants had 2.5 s to respond and were instructed to press the button as quickly as  
140 possible. The instructions were similar in the three-back and four-back tasks.

141 Each load condition (three-back and four-back) had one sequence of  $60+n$  trials. Each sequence  
142 consisted of 20 trials for targets and 40 trials for non-targets. To help participants understand the n-  
143 back task requirements, practice trials were provided for each task. Each n-back task took 10-15  
144 minutes to complete. The paradigms were programmed in MATLAB using PsychToolbox (Brainard,  
145 1997; Pelli, 1997).

## 146 **2.1.4 Electrophysiological Recordings**

147 The EEG was recorded during each n-back task with an online reference against the CPz electrode  
148 using a 64-channel wireless EEG amplifier with a sampling rate of 1000 Hz (NeuSen. W64,  
149 Neuracle, Changzhou, China). The ground electrode was located on the forehead (between the FPz  
150 and Fz electrodes). Electrode impedances were maintained at  $<5 \text{ k}\Omega$ .

## 151 **2.1.5 Initial EEG analysis**

152 Initial EEG analysis includes two steps: (a) EEG signal preprocessing to remove artifacts and to  
153 improve the reliability of data and; (b) Preliminary exploration of brain regions and frequency bands  
154 with the activity corresponding to improvements in performance.

155 For EEG signal preprocessing, all data were analyzed using EEGLAB version 13.0.0b running in  
 156 MATLAB (The MathWorks, USA). Only correctly responded trials were used in the analysis.  
 157 Preprocessing steps included filtering (1-48 Hz), epoching (1000 ms before and 1500 ms after  
 158 stimulus onset), baseline correction (500 ms before stimulus onset), and large artifact removal.  
 159 Ocular artifacts were removed from the independent component analysis (ICA) results. The EEG  
 160 data were then average-referenced. Finally, epochs that contained signals  $>100 \mu\text{V}$  from baseline  
 161 were rejected.

162 In the second step, we used the function *pop\_newtimef* (Arnaud Delorme, CNL/Salk Institute, 2001)  
 163 in EEGLAB for time-frequency analysis. To compare the changes of EEG activity between block 1  
 164 and block 3. The number of cycles in each analysis wavelet was [3 0.5], the padratio was 2, and the  
 165 window length was 350 ms. Meanwhile, the filter bank common spatial pattern (FBCSP) was used to  
 166 explore spatio-frequency modes corresponding to improvements in performance.

167 FBCSP is a machine learning approach used to extract the optimal spatial features from different  
 168 frequency bands (Ang et al., 2008). The original FBCSP algorithm consists of four steps: (1) band  
 169 filtering, (2) spatial filtering, (3) mutual information (MI)-based feature selection, and (4)  
 170 classification. MI is a useful statistical measure that can be used to quantify the relationship between  
 171 variables (Timme & Lapish, 2018). Here, we dropped the classification step. Instead, we focused on  
 172 the spatio-frequency modes (i.e., the brain regions and frequency bands) of the selected features.  
 173 Figure 2 illustrates the workflow. To begin this process, FIR band-pass filters were employed to filter  
 174 the EEG signals into three frequency bands: theta (4-8 Hz), alpha (8-13 Hz), and beta (13-30 Hz).  
 175  $E_{i,q} \in \mathbb{R}^{C \times T}$  denotes the  $i$ -th trial of the  $q$ th frequency band EEG. In the spatial filtering step, we first  
 176 calculated a spatial filter  $W_{i,q}$  for each frequency band using the CSP algorithm (Blankertz et al.,  
 177 2007; Pfurtscheller & Neuper, 2001). Notably,  $W_{i,q}^{-1}$  is the spatial distribution pattern of EEG  
 178 signals. The spatial filter  $W_{i,q}$  was then applied to the EEG matrix  $E_{i,q}$ ,

$$179 \quad Z_{i,q} = W_q E_{i,q} \quad (1)$$

180 where the projected EEG matrix is  $Z_{i,q} \in \mathbb{R}^{C \times T}$ . We selected the  $m$  first and rows of  $Z_{i,q}$  to maximize  
 181 the variation for one class while minimizing the variance for the other class. The normalized feature  
 182 vector  $X_{i,q}^p$  was then computed as follows:

$$183 \quad X_{i,q}^p = \log \left[ \frac{\text{var}(Z_{i,q}^p)}{\sum_{i=1}^{2m} \text{var}(Z_{i,q}^p)} \right], \quad p \in \{1, 2, \dots, 2m\} \quad (2)$$

184 In the third step, the MI-based feature selection method was adopted to find the spatio-frequency  
 185 modes containing the most discriminating features (Battiti, 1994). We defined the binary labels set as  
 186  $l \in L = \{0, 1\}$ , where label 0 is for the lower-capacity subjects and label 1 is for the higher-capacity  
 187 subjects. The mutual information  $I(X_{i,q}^p; L)$  (MI-value) was defined as (Cover, 1999):

$$188 \quad I(X_{i,q}^p; l) = H(X_{i,q}^p) - H(X_{i,q}^p | L) \quad (3)$$

189 where the entropy for the  $T$ -dimensional feature vector  $X_{i,q}^p$  is

$$190 \quad H(X_{i,q}^p) = - \sum_{i=1}^T p(X_{i,q}^p) \log_2 p(X_{i,q}^p) \quad (4)$$

191 and the conditional entropy for the random variable  $X_{i,q}^p$  and  $L$  is

$$192 \quad H(X_{i,q}^p|L) = - \sum_{l \in L} p(l|X_{i,q}^p) \log_2 p(l|X_{i,q}^p) \quad (5)$$

193 We selected the top two largest MI values for each n-back test. The corresponding brain regions and  
 194 frequency bands were considered the most important spatio-frequency modes for n-back performance  
 195 discrimination.

### 196 2.1.6 Graph Convolutional Neural Network (GCNN)

197 We adapted the original Graph Convolutional Neural Network (GCNN) by adding an attention layer  
 198 to capture brain network dynamics and identify the channel providing the greatest contribution to the  
 199 n-back tasks. The GCNN is a generalized version of the convolutional neural network (CNN)  
 200 (Defferrard et al., 2016). By employing spectral graph theory (Chung & Graham, 1997), GCNN can  
 201 reveal the underlying topological information of high-dimensional data. In the second step, we  
 202 investigated the intrinsic spatial patterns of multichannel EEG data using a GCNN model, in which  
 203 each vertex represents an EEG channel and each edge represents the connection between two  
 204 electrodes. Although the GCNN approach is effective for elucidating the spatial patterns of  
 205 multichannel EEG, one limitation is the requirement for a fixed graph representation. In other words,  
 206 the adjacent matrix must be predetermined before applying the GCNN to the data. However, the brain  
 207 states of participants can exhibit time variance during long recording periods. Consequently, inspired  
 208 by graph attention network (GAT) methods (Veličković et al., 2017), we adapted the original GCNN  
 209 by adding an attention layer to capture brain network dynamics and identify the channel providing the  
 210 greatest contribution in the n-back tasks.

211 By definition, a graph can be represented as  $G = \{V, E, A\}$ , in which  $V$  is the set of vertices with the  
 212 number of  $N = |V|$ .  $A$  represents the adjacent matrix, in which each entry denotes the connection  
 213 relationship (i.e., the edge) between two vertices. The set of input features can be denoted as  $h = \{\vec{h}_1,$   
 214  $\vec{h}_2, \vec{h}_3, \dots, \vec{h}_4\}$ , where each feature vector corresponds to a vertex. We first initialized the adjacent  
 215 matrix randomly. The initial adjacent matrix can be updated by the graph attention layer (Veličković  
 216 et al., 2017) during the training process. The updating rule is presented as follows:

217 First, the graph attention layer computes the attention coefficient matrix  $\alpha \in \mathbb{R}^{F' \times F'}$ , where  $F'$  is the  
 218 size of the output feature set. The coefficients can be computed as

$$219 \quad \alpha_{i,j} = \frac{\exp(\text{LeakyReLU}(\vec{w}^T [A\vec{h}_i \parallel A\vec{h}_j]))}{\sum_{k \in N_i} \exp(\text{LeakyReLU}(\vec{w}^T [A\vec{h}_i \parallel A\vec{h}_k]))} \quad (1)$$

220 where  $N_i$  is the set of adjacent vertices of the vertex  $i$ ,  $\vec{w} \in \mathbb{R}^{2F'}$  is the parameter vector of the graph  
 221 attention layer, and  $\parallel$  is the concatenation operation.

222 The adjacent matrix  $A$  can be updated by multiplying the coefficient matrix and the original adjacent  
 223 matrix, as follows:

$$224 \quad A' = \alpha A \quad (2)$$

225 Meanwhile, the graph attention layer also updates the feature set according to the following:

226 
$$\vec{h}'_i = \sigma\left(\sum_{j \in N_i} \alpha_{i,j} A \vec{h}_i\right) \quad (3)$$

227 Then, two GCNN layers are used to classify the performance of the participants.  $L$  denotes the  
228 Laplacian matrix, which can be written as

229 
$$L = D - W \in \mathbb{R}^{N \times N} \quad (4)$$

230 where  $D$  represents the degree matrix.  $L$  can then be decomposed as follows:

231 
$$L = U \Lambda U^T \quad (5)$$

232 The convolution in the non-Euclidean domains can be computed as

233 
$$y = g_\theta(L)x = g_\theta(U \Lambda U^T)x = U g_\theta(\Lambda) U^T x \quad (6)$$

234 where  $g_\theta$  is the non-parametric filter with learnable parameters. A fully connected layer is then  
235 adopted to predict behavioral performance.

### 236 2.1.7 Further EEG Analysis

237 Further EEG analysis based on the results of initial EEG analysis and GCNN, which we explored the  
238 frequency change (4 Hz, 5 Hz, 6 Hz, 7 Hz, 8 Hz) most closely associated with improvements in  
239 performance. To obtain the EEG activity patterns that most closely corresponded to the integer  
240 frequency values of 4, 5, 6, 7, and 8 Hz, we changed the padratio to 8 in further EEG analysis.  
241 Comparing the changes of each integer frequency (4 Hz, 5 Hz, 6 Hz, 7 Hz, 8 Hz) activity between  
242 block 1 and block 3. Measured the MI between power features (4 Hz, 5 Hz, 6 Hz, 7 Hz, 8 Hz) and n-  
243 back performance to investigate which frequency was more sensitive to changes in behavior.  
244 Specifically, the frequency with the largest MI magnitude is chosen as the stimulation frequency and  
245 was applied to modulate working memory.

## 246 2.2 Results

### 247 2.2.1 Behavioral Analyses

248 The target-ACC of the n-Back task was analyzed using a mixed-design analysis of variance  
249 (ANOVA) employing one between-subject factor of group (HP or LP) and two within-subject factors  
250 of back (three-back or four-back) and block (block 1, 2, or 3). As shown in Figure 4, the main effect  
251 of block was significant ( $F_{2, 38} = 23.015, p = .000, MSE = 3266.76, \eta^2 = .55$ ), suggesting that target-  
252 ACC increased as the participants practiced more (target-ACC<sub>block3</sub> > target-ACC<sub>block2</sub> > target-  
253 ACC<sub>block1</sub>,  $ps. < .05$ ). The main effect of back was also significant ( $F_{1, 19} = 25.778, p = .000, MSE$   
254  $= 5831.80, \eta^2 = .58$ ), suggesting that target-ACC was significantly better on the four-back than the  
255 three-back task ( $ps. < .05$ ). The main effect of group was significant ( $F_{1, 19} = 15.003, p = .001, MSE$   
256  $= 5630.21, \eta^2 = .44$ ), suggesting that target-ACC was significantly better among the HP group than  
257 among the LP group ( $ps. < .05$ ). We also observed a significant interaction effect between block and  
258 group ( $F_{2, 38} = 6.02, p = .005, MSE = 828.77, \eta^2 = .24$ ), suggesting that target-ACC increased with  
259 practice in the LP group (target-ACC<sub>block3</sub> > target-ACC<sub>block1</sub>, target-ACC<sub>block3</sub> > target-ACC<sub>block1</sub>,  $ps.$   
260  $< .05$ ). In the HP group, only block 3 target-ACC was significantly greater than that in block 1.  
261 Further comparisons indicated that target-ACC significantly improved as the number of practice  
262 trials increased in the LP group (three-back: target-ACC<sub>block3</sub> > target-ACC<sub>block1</sub>,  $ps. < .05$ ; four-back:  
263 target-ACC<sub>block3</sub> > target-ACC<sub>block2</sub> > target-ACC<sub>block1</sub>,  $ps. < .05$ ). However, this effect was not  
264 observed in the HP group.

265 The same mixed-design ANOVA was conducted for the RT of the correct target trials. Only the main  
266 effect of block was significant ( $F_{1.49, 28.22} = 13.26, p = .000, MSE = .43, \eta^2 = .41$ , with Greenhouse-  
267 Geisser correction), suggesting that the reaction time decreased as the participants practiced more  
268 ( $RT_{block1} > RT_{block3}, RT_{block2} > RT_{block3}, ps. < .05$ ). Further comparisons indicated that RT  
269 significantly decreased as the number of practice trials increased in the relatively simple three-back  
270 task (For three-back,  $RT_{block1} > RT_{block3}, RT_{block2} > RT_{block3}, ps. < .05$ , in both the HP and LP groups),  
271 but not in the relatively difficult four-back task.

272 Our analysis of behavioral outcomes indicates that the target-ACC was affected by naturally capacity  
273 of the verbal working memory, and in block 3 the target-ACC was significantly higher than block 1  
274 within the LP group. RT was affected by the difficulty of the task, and the practice effect was only  
275 observed in the simpler three-back task.

### 276 2.2.2 Initial EEG Analyses

277 After EEG signal preprocessing, we conducted an initial analysis to explore the brain regions and  
278 frequency bands exhibiting changes that corresponded to increases in target-ACC in the LP group.  
279 For each frequency band (i.e., theta, alpha, beta) and each block (i.e., block1, block3), the average  
280 power between 100 ms and 700 ms was computed and was further averaged among the two n-back  
281 tasks. Figure 5 shows the event-related synchronization distribution from block 1 to block 3  
282 ( $Power_{block3} - Power_{block1}$ ). According to this figure, the power seemed relatively stable in the  
283 central and parietal regions, regardless of the group or frequency band. Compared with those in block  
284 1, theta and alpha activity was significantly enhanced in the prefrontal, frontal, and occipital lobes in  
285 block 3. Considering that the occipital lobe is more involved in visual processing, while the  
286 prefrontal and frontal lobes are more closely related to working memory processing, we focused  
287 further analyses on theta and alpha activity in the prefrontal and frontal lobes. After preliminary  
288 identification of brain regions and frequencies, the theta and alpha power in Fp1, Fp2, F3, and F4 of  
289 the n-back task was analyzed using a mixed-design ANOVA employing one between-subject factor  
290 of group (HP or LP) and two within-subject factors of back (three-back or four-back) and block  
291 (block 1, 2, or 3). For theta activity, the main effect of block was significant ( $F_{2, 34} = 5.18, p = .011,$   
292  $MSE = 22.99, \eta^2 = .23$ ) in Fp1,  $power_{block3}$  was significantly greater than  $power_{block1}$ , and  $power_{block2}$   
293 was significantly greater than  $power_{block1}$ . For theta activity, the main effect of block was significant  
294 ( $F_{2, 34} = 6.39, p = .004, MSE = 26.12, \eta^2 = .27$ ) in Fp2,  $power_{block3}$  was significantly greater than  
295  $power_{block1}$ , and  $power_{block2}$  was significantly greater than  $power_{block1}$ . For theta activity, the main  
296 effect of block was significant ( $F_{2, 34} = 7.30, p = .002, MSE = 16.79, \eta^2 = .30$ ) in F3, and  $power_{block2}$  was  
297 significantly greater than  $power_{block1}$ . For alpha activity, the main effect of block was significant ( $F_{2,$   
298  $34 = 3.86, p = .031, MSE = 16.06, \eta^2 = .19$ ) in Fp2, and  $power_{block3}$  was significantly greater than  
299  $power_{block1}$ . No other main effects were significant (see Table 1). These findings suggested that, when  
300 compared with other combinations (i.e., theta in frontal region, alpha in frontal region, alpha in  
301 prefrontal region), theta activity in the prefrontal region exhibited trends similar to those observed for  
302 changes in behavior (i.e., Compared with block 1, the behavior [target-ACC and RT] and theta  
303 activity in block 3 were changed significantly).

304 Meanwhile, to determine the most discriminative spatio-frequency, we performed quantitative  
305 analysis on the 2m (m=2) selected spatial features by measuring MI. We selected the top two largest  
306 MI values for each test (see Table 2) and visualized the corresponding EEG topographies (see Figure  
307 6). Table 2 and Figure 6 show that all selected MI values were obtained from the lower band (theta,  
308 alpha) activities in frontal and prefrontal region, indicating that lower band activities in frontal and  
309 prefrontal region can provide more information for predicting performance on the n-back test. (i.e.,



310 more sensitive to n-back performance differences). In particular, among the three tests, the features  
311 extracted from the theta band had larger MI values than those extracted from the alpha band, aside  
312 from those in the three-back test. Thus, we believe that theta band activity in frontal and prefrontal  
313 region may be a better indicator of changes in working memory performance.

### 314 **2.2.3 Graph Convolutional Neural Network (GCNN)**

315 We use an adapted graph attention mechanism to capture brain network dynamics and find the  
316 channel contributing most to performance in the n-back tasks. The proposed model achieved a  
317 classification accuracy of 80.4%. We selected the top 15 largest weights from the output optimal  
318 adjacent matrix and normalized the chosen weights. The edge between Fp1 and Fp2 had the largest  
319 weight at 0.78, suggesting that the functional connection between Fp1 and Fp2 was most important  
320 for n-back task performance.

321 The result of GCNN was similar to the initial EEG analysis, indicating that the brain activity in  
322 prefrontal region was associated with the changes in working memory performance.

### 323 **2.2.4 Further EEG Analysis**

324 In further EEG analysis, we investigated the frequency (4 Hz, 5 Hz, 6 Hz, 7 Hz, and 8 Hz) for which  
325 changes in activity were most closely associated with improvements in behavior. The same mixed-  
326 design ANOVA was conducted for EEG powers of 4, 5, 6, 7, and 8 Hz in Fp1 and Fp2. Table 3 lists  
327 the significant results. We observed that 8 Hz activity in the prefrontal region (especially Fp2) was  
328 most closely related to target-ACC. Specifically, for both the three- and four-back tasks, 8 Hz activity  
329 was significantly greater in block 3 than in block 1 in the LP group, as was the target-ACC.  
330 Prefrontal activity at 6 and 7 Hz appeared to be related to both target-ACC and RT.

331 Meanwhile, we measured the MI between power features (4 Hz, 5 Hz, 6 Hz, 7 Hz, and 8 Hz) of the  
332 two selected regions (Fp1 and Fp2) and n-back performance (see Table 4). We observed that the 8 Hz  
333 power of both regions had larger MI values than other frequencies. Since the magnitude of MI is an  
334 indicator of shared information between variables, we inferred that dependency was greatest between  
335 8 Hz power and n-back task performance when compared with that for the other four frequency-  
336 performance pairs.

337 Considering the specificity of the stimulus, these findings indicated that applying 8-Hz stimulation to  
338 the prefrontal lobe may be effective for improving verbal working memory performance.

### 339 **2.2.5 Summary**

340 EEG analysis indicated that 8 Hz activity in the prefrontal lobe was associated with the correct  
341 response rate in the verbal working memory task, while 6 and 7 Hz activity appeared to be associated  
342 with both the correct response rate and response time. Dependency was greatest between 8 Hz power  
343 in the prefrontal cortex and n-back task performance when compared with that for the other four  
344 frequency-performance pairs. In addition, machine learning results suggested that the functional  
345 connection between Fp1 and Fp2 was most important for performance in the n-back tasks. These  
346 EEG and machine learning results were used to design Experiment 2, in which the prefrontal lobe  
347 was selected as the target for stimulation at a frequency of 8 Hz. In Experiment 2, we compared the  
348 modulatory effects of 8 Hz (selected stimulation), 40 Hz (control) and sham stimulation on verbal  
349 working memory.

## 350 **3 Experiment 2**

## 351 **3.1 Materials and Methods**

### 352 **3.1.1 Participants**

353 In Experiment 2, we recruited 67 young healthy volunteers, but only 48 were included in the  
354 behavioral data analysis (20-30 years old). The exclusion criteria were as follows: 1) participants who  
355 did not follow the instructions, 2) participants who had outstanding performance in pre-stimulation  
356 (target-ACC of >90% in the pre-stimulation tasks), and 3) extreme values (target-ACC or RT  
357 exceeding two standard deviations from the mean). Among the 48 included participants, 12 were  
358 excluded from the EEG analysis because of poor signal quality, and 36 participants (12 females;  
359 mean age  $23.67 \pm 1.97$  years) were included in the analyses.

360 All participants had normal or corrected-to-normal vision and were right-handed. A preliminary  
361 questionnaire screening with each subject ensured that all inclusion criteria for transcranial electric  
362 stimulation applications were met (i.e., no history of neuropsychiatric disorders [e.g., epilepsy], no  
363 brain injuries, no pregnancy, no intake of neuroleptic or hypnotic medications, and no metallic or  
364 electrical implants in the body).

365 This study was approved by the Ethics Committee of the Shenzhen Institute of Advanced  
366 Technology, and all experimental procedures conformed to the principles of the Helsinki Declaration  
367 regarding human experimentation. All participants provided oral consent, signed informed consent  
368 documents, and received 200RMB for their participation.

### 369 **3.1.2 Experimental Design and Schedule**

370 Experiment 2 was conducted using a single-blinded sham-controlled design. Participants were  
371 randomly divided into a selected group ( $n = 14$ ), sham group ( $n = 18$ ), and control group ( $n = 16$ ).  
372 They completed three sessions (pre-stimulation, stimulation, and post-stimulation). Each session  
373 included one n-back task (blocks 1, 2, or 3). In the pre-stimulation session, resting-state EEG data  
374 were collected for 5 min before the block 1 n-back task. The participants then underwent tACS while  
375 performing the block 2 n-back tasks in the stimulation session. The post-stimulation session was the  
376 same as that in the pre-stimulation session. Task-state EEG data were recorded for block 1 (the pre-  
377 stimulation session) and block 3 (the post-stimulation session). Finally, subjects completed an  
378 electrical stimulation sensitivity questionnaire to report their experienced regarding phosphenes,  
379 dizziness, tingling, and itching.

### 380 **3.1.3 N-Back Tasks**

381 Compared with the n-Back tasks of Experiment 1, those in Experiment 2 included an additional five-  
382 back task to further investigate the effect of tACS on performance on a more difficult working  
383 memory task. In addition, there are nine sequences in total, and each back included three sequences.  
384 Each sequence contained  $33+n$  trials, including 11 target trials and 22 non-target trials.

### 385 **3.1.4 EEG Recordings and Data Preprocessing**

386 EEG data recording, processing, and time-frequency analyses were the same as those in Experiment  
387 1.

### 388 **3.1.5 Transcranial Alternating Current Stimulation**

389 tACS was delivered via a pair of  $4.5 \times 5.5$  cm<sup>2</sup> gel electrodes connected to a battery-driven  
390 stimulator. The gel electrode impedances were  $<500 \Omega$ . One of the electrodes was placed over FP1-

391 AP7 and the other was placed over FP2-AF8. The stimulation intensity was 2.0 mA (peak-to-peak  
392 current) and was applied for 20 min during the stimulation session in Experiment 2. The selected  
393 group received 8 Hz tACS (8 Hz group) and the control group received 40 Hz tACS (40 Hz group).  
394 The sham group was also equipped with tACS electrodes but did not receive stimulation.

## 395 3.2 Results

### 396 3.2.1 Behavioral Analyses

397 The target-ACC of the n-Back task was analyzed using a mixed-design ANOVA employing one  
398 between-subject factor of group (8 Hz, 40 Hz, or sham) and two within-subject factors of back  
399 (three-back, four-back, or five-back) and block (block 1 or 2). As shown in Figure 7A, the main  
400 effect of block was significant ( $F_{1, 39} = 62.56, p = .000, MSE = 6059.908, \eta^2 = .62$ ), suggesting that  
401 target-ACC was greater in block 3 than in block 1. The main effect of back was also significant ( $F_{1.56, 60.87} = 42.90, p = .000, MSE = 611.80, \eta^2 = .52$ , with Greenhouse-Geisser correction), suggesting that  
402 target-ACC decreased significantly as the difficulty of the task increased (target-ACC<sub>three-back</sub> >  
403 target-ACC<sub>four-back</sub> > target-ACC<sub>five-back</sub>,  $ps. < .001$ ). We also observed a significant interaction effect  
404 between block and group ( $F_{2, 39} = 7.11, p = .002, MSE = 689.06, \eta^2 = .27$ ), suggesting that target-ACC  
405 was significantly greater for block 3 than for block 1 at 8 Hz, 40 Hz, and in the sham condition ( $ps. < .05$ ).  
406 The interaction effect between back and block ( $F_{2.78} = 3.38, p = .039, MSE = 178.69, \eta^2 = .08$ )  
407 was also significant, suggesting that target-ACC was significantly greater in block 3 than in block 1  
408 for three-back, four-back, and five-back tasks ( $ps. < .05$ ). Further comparisons indicated that block 3  
409 target-ACC in the 8 Hz group was significantly higher than that in block 1 for the three-back, four-  
410 back, and five-back tasks ( $ps. < .05$ ). Furthermore, in the sham group, target-ACC was significantly  
411 higher in block 3 than in block 1 for the three-back and four-back ( $ps. < .05$ ). However, in the 40 Hz  
412 group, target-ACC was significantly greater in block 3 than in block 1 for the three-back task only.  
413

414 The same mixed-design ANOVA was conducted to examine RT for correct target trials. As shown in  
415 Figure 7B, the main effect of block was significant ( $F_{1, 39} = 87.58, p = .000, MSE = 4.18, \eta^2 = .69$ ),  
416 suggesting that block 3 RTs were shorter than those in block 1. The main effect of back was also  
417 significant ( $F_{1.59, 62.18} = 25.12, p = .000, MSE = .16, \eta^2 = .39$ , with Greenhouse-Geisser correction),  
418 suggesting that RT increased significantly as the difficulty of the task increased (RT<sub>four-back</sub> > RT<sub>three-</sub>  
419 <sub>back</sub>, RT<sub>five-back</sub> > RT<sub>three-back</sub>,  $ps. < .001$ ). Further comparisons indicated that RT was significantly  
420 shorter in block 3 than in block 1 for all three groups (8 Hz, 40 Hz and sham) and in all three task  
421 conditions (three-back, four-back, and five-back) ( $ps. < .05$ ).

422 As shown above, the strong practice effect resulted in better performance in block 3 than in block 1.  
423 Therefore, we used the improvements in target-ACC (i.e., target-ACC<sub>block3</sub> – target-ACC<sub>block1</sub>) and  
424 RT (i.e., RT<sub>block3</sub> – RT<sub>block1</sub>) as behavioral indices to compare which stimulation setting induced the  
425 greatest improvements in verbal working memory. Improvements in target-ACC in each n-back task  
426 were analyzed using a mixed-design ANOVA employing one between-subject factor of group (8 Hz,  
427 40 Hz, or sham) and one within-subject factor of back (three-back, four-back, or five-back). As  
428 shown in Figure 8A, the main effect of back was significant ( $F_{2, 78} = 3.38, p = .039, MSE = 357.38, \eta^2 = .08$ ),  
429 indicating a smaller degree of improvement in target-ACC in the five-back task than in the  
430 three-back task. The main effect of group was significant ( $F_{2, 39} = 7.11, p = .002, MSE = 1378.12, \eta^2 = .27$ ),  
431 indicating that the target-ACC improvement was significantly greater in the 8 Hz group than in  
432 the 40 Hz and sham groups ( $ps. < .05$ ). Further comparisons revealed that the target-ACC  
433 improvement of 8 Hz group was significantly greater than that of the 40-Hz group and sham group  
434 ( $ps. < .05$ ) in the three-back and four-back tasks. In the five-back task, the improvement in target-

435 ACC was significantly greater in the 8 Hz group than in the 40 Hz group ( $p_s < .05$ ). The same  
436 analysis was conducted to examine improvements in RT. However, no significant effects were  
437 observed in the RT analysis.

438 We further aimed to explore the effects of the three stimulation conditions on verbal working  
439 memory in the HP and LP groups, which were determined based on performance in block 1. Scores  
440 for the three-back, four-back, and five-back tasks were summed, and participants who scored lower  
441 than the median were assigned to the LP group, while those who scored higher than the median were  
442 assigned to the HP group. Eventually, the volunteers were divided into six groups: an LP group  
443 receiving 8-Hz stimulation (LP-8 Hz) ( $n = 6$ ), an HP group receiving 8-Hz stimulation (HP-8 Hz) ( $n$   
444  $= 8$ ), an LP group receiving sham stimulation (LP-sham) ( $n = 10$ ), an HP group receiving sham  
445 stimulation (HP-sham) ( $n = 8$ ), an LP group receiving 40-Hz stimulation (LP-40 Hz) ( $n = 8$ ), and an  
446 HP group receiving 40-Hz stimulation (HP-40 Hz) ( $n = 8$ ). The target-ACC of the n-Back task was  
447 analyzed using a mixed-design ANOVA employing one between-subject factor of group (LP-8 Hz,  
448 HP-8 Hz, LP-sham, HP-sham, LP-40 Hz, and HP-40 Hz) and two within-subject factors of back  
449 (three-back, four-back, or five-back) and block (block 1 or 3).

450 As shown in Figure 9A, the main effect of block was significant ( $F_{1, 36} = 69.90, p = .000, MSE$   
451  $= 6183.12, \eta^2 = .66$ ), suggesting that target-ACC was significantly greater in block 3 than in block 1.  
452 The main effect of back was also significant ( $F_{1, 49, 53.44} = 51.48, p = .000, MSE = 6607.74, \eta^2 = .59,$   
453 with Greenhouse-Geisser correction), suggesting that target-ACC decreased significantly as the  
454 difficulty of the task increased (target-ACC<sub>three-back</sub> > target-ACC<sub>four-back</sub> > target-ACC<sub>five-back</sub>,  $p_s$   
455  $< .001$ ). The main effect of group was significant ( $F_{5, 36} = 19.47, p = .000, MSE = 4190.33, \eta^2 = .73$ ),  
456 suggesting a complex difference between groups. We also observed a significant interaction effect  
457 between block and group ( $F_{5, 36} = 4.46, p = .003, MSE = 394.32, \eta^2 = .38$ ), indicating that target-ACC  
458 in block 3 was significantly greater than that in block 1 in both the LP-sham and HP-sham groups  
459 ( $p_s < .05$ ). The analysis also indicated that block 3 target-ACC was significantly greater than block 1  
460 target-ACC in the LP-8 Hz and HP-8 Hz groups ( $p_s < .001$ ). Further comparisons indicated that  
461 target-ACC in block 3 was significantly greater than that in block 1 in the three-back, four-back, and  
462 five-back tasks within the LP-8 Hz group ( $p_s < .05$ ). Within the HP-8 Hz group, block 3 target-ACC  
463 was greater than block 1 target-ACC for the three- and four-back tasks only ( $p_s < .05$ ). We also  
464 observed improvements in target-ACC between block 1 and 3 of the three-back task in the LP-40  
465 Hz, HP-40 Hz, and HP-sham group ( $p_s < .05$ ). Target-ACC was significantly greater in block 3 than  
466 in block 1 for the five-back task in the LP-sham group ( $p_s < .05$ ).

467 To weaken the effect of practice on the results, the target-ACC improvement in the n-back task was  
468 analyzed using a mixed-design ANOVA employing one between-subject factor of group (LP-8 Hz,  
469 HP-8 Hz, LP-sham, HP-sham, LP-40 Hz, and HP-40 Hz) and one within-subject factor of back  
470 (three-back, four-back, or five-back). As shown in Figure 9B, the main effect of group was  
471 significant ( $F_{5, 36} = 4.46, p = .003, MSE = 788.64, \eta^2 = .38$ ), indicating that the target-ACC  
472 improvement was significantly greater in the LP-8 Hz group than in the other groups. Further  
473 comparisons revealed that the target-ACC improvement was significantly greater in the LP-8 Hz  
474 group than in the LP-sham, HP-sham, LP-40 Hz, and HP-40 Hz groups in the three-back and four-  
475 back tasks ( $p_s < .05$ ). In the five-back task, the target-ACC improvement of the LP-8 Hz group was  
476 significantly greater than that of the LP-40 Hz and HP-40 Hz groups ( $p_s < .05$ ). As our previous  
477 analysis revealed no differences in the effects of the three stimulation conditions on RT, we did not  
478 analyze RT results here.

### 479 3.2.2 EEG Analyses

480 The theta power in Fp1 and Fp2 during the n-back task was analyzed using a mixed-design ANOVA  
481 employing one between-subject factor of group (8 Hz, 40 Hz, or sham) and two within-subject  
482 factors of back (three-back, four-back, or five-back) and block (block 1 or 2). In Fp1, the main effect  
483 of block was significant ( $F_{1,33} = 4.23, p = .048, MSE = 95.32, \eta^2 = .11$ ), and the theta power was  
484 significantly greater in block 3 than in block 1. Further comparisons indicated that theta power during  
485 the three-back and four-back tasks was significantly greater in block 3 than in block 1 in the 8 Hz  
486 group ( $ps < .05$ ), while that during the five-back task was only marginally significantly greater  
487 ( $ps = .056$ ). No significant effects were observed in the 40 Hz and sham groups. In Fp2, the main  
488 effect of block was marginal significant ( $ps = .056$ ), and the theta power was greater in block 3 than  
489 in block 1. Furthermore, no effect was significant in the theta power analysis for Fp2.

490 In addition, we explored the effects of the three stimulation conditions on EEG activity associated  
491 with verbal working memory in the HP and LP groups. The theta power in Fp1 and Fp2 during the n-  
492 back task was analyzed using a mixed-design ANOVA employing one between-subject factor of  
493 group (LP-8 Hz, HP-8 Hz, LP-sham, HP-sham, LP-40 Hz, and HP-40 Hz) and two within-subject  
494 factors of back (three-back, four-back, or five-back) and block (block 1 or 2). No effect was  
495 significant in the theta power analysis for either Fp1 or Fp2.

### 496 3.2.3 Adverse Effects Ratings

497 Participants were required to rate their adverse experiences during and after stimulation. The  
498 questionnaire used a four-point Likert scale ranging from 1 (none) to 4 (extreme). Overall, tACS was  
499 well-tolerated. For 8-Hz and 40-Hz stimulation, participants reported phosphenes (100%), dizziness  
500 (40%), tingling (73.33%), and itching (46.67%) during stimulation. These effects were attenuated  
501 after the stimulation, and participants reported phosphenes (3.45%), dizziness (24.14%), tingling  
502 (0%), and itching (6.9%). According to the one-way ANOVA, most of the ratings of adverse  
503 experiences that occurred during stimulation significantly differed between groups, including  
504 phosphenes ( $F_{2,45} = 20.52, p < .001$ ), tingling ( $F_{2,45} = 14.15, p < .001$ ), and itching ( $F_{2,45} = 3.71, p$   
505  $= .032$ ). For phosphenes and tingling, the ratings of the 8 Hz and 40 Hz groups were significantly  
506 greater than those of the sham group ( $ps < .001$ ). For itching, the rating of the 40 Hz group was  
507 significantly greater than that of the sham group ( $p = .034$ ). However, the rating of dizziness that  
508 occurred during stimulation did not significantly differ between the groups ( $F_{2,45} = 1.52, p = .230$ ).  
509 The ratings of adverse experiences that occurred after stimulation did not significantly differ between  
510 groups.

## 511 4 Discussion

### 512 4.1 EEG activities related to positive behavior changes

513 In Experiment 1, participants complete three n-back tasks (blocks 1, 2, and 3). One week between  
514 block 1 and block 2. Ten minutes between block 2 and block 3. The result showed that the practice  
515 effect was not affected by the interval time. Practice effect of target-ACC was mainly affected by  
516 participant's naturally verbal working memory capacity. Low performance subjects showed stronger  
517 practice effects than high performance participants. Practice effect of RT was mainly affected by the  
518 task difficulty. Subjects showed stronger practice effect in relatively simple three-back task than in  
519 relatively difficult four-back task.

520 In initial EEG analysis, we first locked the EEG characteristic regions and frequency bands by  
521 observing the differences of the topographic maps between block 3 and block 1. We found that theta

522 and alpha activation of block 3 was greater than block 1 in prefrontal and frontal regions.  
523 Specifically, theta activity in the prefrontal region exhibited trends similar to those observed for  
524 changes in behavior. Meanwhile, the result of FBCSP suggested that theta band activity in frontal  
525 and prefrontal regions may be a better indicator of changes in working memory performance. In  
526 addition, we used an adapted graph attention mechanism to capture the brain network dynamics and  
527 to find the channel contributing most to the performance in n-back tasks. The result was similar to  
528 EEG analysis, finding that brain activity in prefrontal region was associated with the changes in  
529 working memory performance. Thus, we concluded that theta activity in prefrontal region was  
530 associated with improvements in verbal working memory performance.

531 In further EEG analysis, we investigated the frequency (4 Hz, 5 Hz, 6 Hz, 7 Hz, and 8 Hz) for which  
532 changes in activity were most closely associated with improvements in behavior. The result indicated  
533 that 8 Hz activity in the prefrontal lobe was associated with the correct response rate in the verbal  
534 working memory task, while 6 and 7 Hz activity appeared to be associated with both the correct  
535 response rate and response time. Considering the specificity of the stimulus, these findings indicated  
536 that applying 8-Hz stimulation to the prefrontal lobe may be effective for improving verbal working  
537 memory performance.

#### 538 **4.2 The modulatory effects of 8 Hz (selected stimulation), 40 Hz (control), and sham** 539 **stimulation on verbal working memory**

540 In experiment 2, we compared the modulatory effects of 8 Hz (selected stimulation), 40 Hz (control),  
541 and sham stimulation on verbal working memory. The strong practice effects showed better  
542 performance in block 3 than block 1. Therefore, we used the improvements in target-ACC and RT as  
543 behavioral indices to compare which stimulation setting induced the greatest improvements in verbal  
544 working memory. The target-ACC improvement of 8 Hz group was significantly greater than that 40  
545 Hz group and sham group in the three-back and four-back tasks. However, no significant effects were  
546 observed in RT analysis. Those results confirmed to the inference of experiment 1, 8 Hz activity in  
547 prefrontal region was associated with the correct response rate in verbal working memory task.

548 We further explored the effects of three stimulation conditions on verbal working memory in HP and  
549 LP groups, which were determined based on performance in block 1. In a relatively simple three-  
550 back task, target-ACC for most of subjects had a significantly higher in block 3 than block 1. In  
551 relatively difficult four-back and five-back tasks, only LP-8 Hz group maintained a stable and  
552 significant improvement in target-ACC. The improvements in target-ACC of LP-8 Hz was  
553 significantly greater than 40 Hz and sham group. The target-ACC of verbal working memory was  
554 improved significantly using 8 Hz stimulation than 40 Hz and sham stimulation (Especially for  
555 participants with low verbal working memory).

556 Overall, accordance to with several previous studies (Biel et al., 2021; Kilian et al., 2020; Pahor &  
557 Jaušovec, 2018; Vosskuhl et al., 2015), our findings indicated that theta band activity was strongly  
558 associated with verbal working memory, and that theta tACS improved verbal working memory  
559 performance. Moreover, our study extends these findings, as we investigating the EEG characteristics  
560 correspond to the improvements in working memory performance in both HP and LP groups. Our  
561 analysis revealed that the changes in 8 Hz activity prefrontal region exhibited trends similar to those  
562 for the correct response rate in verbal working memory tasks. These results may indicate that 8 Hz  
563 activity in prefrontal region supports response accuracy. In Experiment 2, we applied 8 Hz tACS in  
564 prefrontal region, representing the biggest difference between the current investigation and previous  
565 studies. Although our stimulus targets and frequencies differed from those used in previous research,

566 the performance of verbal working memory was improved significantly by using 8 Hz stimulation  
567 than 40 Hz and sham stimulation (Especially for participants with low verbal working memory). The  
568 result suggested that 8 Hz tACS at prefrontal region had an effective intervention on improving  
569 verbal working memory.

570 In EEG analysis, the theta power of prefrontal region during n-back tasks was greater in block 3 than  
571 block 1 with 8 Hz group. No significant effects were observed in 40 Hz and sham groups. The  
572 results suggested that after stimulation 8 Hz tACS improves brain oscillations of the theta frequency  
573 band. It is worth considering that the degree of change in EEG is relatively subtle compared to the  
574 change in behavior.

### 575 **4.3 Conclusions**

576 The results of Experiment 1 showed that prefrontal lobe theta power was particularly sensitive to the  
577 amount of practice. Specifically, 8 Hz activity in the prefrontal region was related to improvements in  
578 response accuracy among participants with low verbal working memory ability, while activity at 6  
579 and 7 Hz was related to both response accuracy and RT. Meanwhile, machine learning also indicated  
580 that frontal lobe theta power (especially for 8 Hz activity) is sensitive to improvements in  
581 performance. In Experiment 2, we utilized a frequency of 8 Hz to target the prefrontal region during  
582 tACS. The results of Experiment 2 showed that 8 Hz tACS could effectively improve performance on  
583 verbal n-back tasks, and the brain oscillations of the theta frequency band increased after stimulation.  
584 In addition, when 8 Hz stimulation was delivered, the target-ACC improvement was significantly  
585 higher in the LP group than other participants in sham and 40 Hz groups. These results suggest that  
586 applying 8 Hz electrical stimulation to the prefrontal region can effectively improve verbal working  
587 memory performance (especially in individuals with low ability), while stimulation at 40 Hz and  
588 sham stimulation exert no such effects. In conclusion, using EEG features related to positive  
589 behavioral changes to select brain regions and stimulation patterns for tACS is an effective  
590 intervention for improving working memory.

### 591 **4.4 Significance**

592 The current study indicated that employing 8 Hz tACS in the prefrontal region can improve  
593 performance on n-back tasks that assess working memory. Delivery of tACS at 8 Hz may be  
594 especially helpful for improving verbal working memory in participants with generally low initial  
595 ability. Moreover, few studies to date have focused on stimulation at Fp1 and Fp2.

596 More importantly, the current study provides new insight into the selection of appropriate parameters  
597 for tACS. Researchers can first investigate the neurophysiological features associated with positive  
598 behavioral changes in specific cognitive tasks. Then, selecting tACS targets and parameters based on  
599 the feature. This method could be particularly helpful when the source of brain oscillations of  
600 specific cognitive functions is not clearly understood. For example, most tACS can influence the  
601 superficial regions of brain cortex only (Brunyé, 2018). The spatial resolution of EEG is relatively  
602 low. If stimulation of superficial brain regions can causally influence cognitive function, the  
603 experiment could indicate that the specific superficial brain region is involved in cognitive function.  
604 Using the same logic, different combinations of neurophysiological and stimulation approaches can  
605 also be employed to study the mechanisms of cognitive functions and aid the development of  
606 interventions for various mental disorders.

### 607 **4.5 Limitations**

608 The current study applied various analyses to determine the EEG features associated with  
609 improvements in verbal working memory performance. The results of these analyses were not  
610 homogeneous. The final selection of the parameters was a balance between the results of these  
611 analyses. Therefore, the selection of the parameters was not stable, meaning that selection may  
612 depend on the number and types of analyses used. If more analyses are included, the results may be  
613 more inconsistent, which may make selection difficult. However, the number of analyses was not a  
614 key feature of the current paradigm. It is important to determine the parameters of tACS by analyzing  
615 the electrophysiological online signal, regardless of the number of analyses employed. In addition,  
616 the target region for stimulation was very large and may have covered at least four channel sites in  
617 the EEG cap. This shortcoming was mainly attributed to the tACS design. The more specific the  
618 region, the smaller the electrode, and the more pain the participants would experience. This pain  
619 could drastically reduce cognitive function because it constitutes a significant distraction.

620 Finally, the approach utilized in the current study may be inconvenient because it requires at least  
621 two separate experiments. It has been suggested that individualized stimulation may be better. For  
622 example, researchers could analyze the neurophysiological data for each participant immediately  
623 after the first test of cognitive function and immediately apply the stimulation in the same  
624 experiment. In this scenario, the difference between correct and incorrect trials could be revealed by  
625 rapid analyses or machine learning methods. However, these issues are much more complicated in  
626 practice. For example, correct trials do not fully reflect true judgment; participants may press a button  
627 based on guesswork. Although researchers could subtract the false alarm rate from the target-ACC to  
628 evaluate function, the number of correct trials wherein participants respond by guessing would be  
629 unknown. Including these trials in the analyses will greatly reduce the reliability of the analyses that  
630 aim to differentiate correct and incorrect trials because different participants might have different  
631 tendencies to guess. In addition, the number of correct and incorrect trials is difficult to control, and  
632 they would directly influence the results of the analyses.

#### 633 **4.6 Further Study**

634 Further studies could employ the same procedures in a cohort of older adults to investigate whether  
635 this method is effective in improving the working memory of the older adults and those with  
636 cognitive decline.

637 In addition, more cognitive tasks that are used to assess working memory could be included in future  
638 studies, employing a similar design to Experiments 1 and 2. By doing this, the differences and the  
639 common brain activities of working memory among various tasks could be revealed, which may help  
640 to explain the inconsistent results of previous studies.

641 Future studies should employ AI training to improve cognitive function. Although the differentiation  
642 between correct and incorrect trials may be difficult, differentiation of HP and LP groups using AI is  
643 feasible. The current study already trained AI to differentiate the two groups. In further studies, this  
644 AI could analyze all trials in the first session and classify the case as HP or LP. In the second session,  
645 half of the cases in each group would receive the corresponding stimulation. Comparison of the  
646 stimulated and non-stimulated cases in the LP group may be more convincing because the two  
647 sessions would include the same participants and comparison within a group might make the  
648 difference greater.

#### 649 **5 Conflicts of Interest:**



650 Author YL and PW are employed by Shenzhen Zhongkehuayi Technology Co. Ltd. The remaining  
651 authors declare that the research was conducted in the absence of any commercial or financial  
652 relationships that could be construed as a potential conflict of interest.

## 653 **6 Author Contributions**

654 PW designed the study. MG and LZ contributed to the literature search, data collection, data analysis,  
655 and interpretation of the results. YL provided hardware support for the experiment and participated in  
656 data collection. RW is responsible for machine learning data analysis. All authors contributed to the  
657 writing of this paper.

## 658 **7 Funding**

659 This work was supported in part by National Key R&D Program of China (2018YFA0701400 P.W.),  
660 the Youth Innovation Promotion Association of the Chinese Academy of Sciences (2017413 P.W.).

## 661 **8 Acknowledgements**

662 This work was supported in part by the National Key R&D Program of China (2018YFA0701403 to  
663 P.W.), the Youth Innovation Promotion Association of the Chinese Academy of Sciences (2017413  
664 to P.W.).

## 665 **9 Data availability statement**

666 The authors declare that the data supporting the findings of this study are available within the article  
667 or from the authors upon request.

## 668 **10 References**

- 669 Ali, M. M., Sellers, K. K., and Fröhlich, F. (2013). Transcranial alternating current stimulation  
670 modulates Large-Scale cortical network activity by network resonance. *J Neurosci.* 33, 11262-  
671 11275. <https://doi.org/10.1523/JNEUROSCI.5867-12.2013>
- 672 Ang, K. K., Chin, Z. Y., Zhang, H., and Guan, C. (2008). Filter bank common spatial pattern (FBCSP)  
673 in brain-computer interface. In *2008 IEEE international joint conference on neural networks*  
674 (IEEE world congress on computational intelligence) (pp. 2390-2397). IEEE.
- 675 Babiloni, C., Lizio, R., Marzano, N., Capotosto, P., Soricelli, A., Triggiani, A. I., Cordone, S.,  
676 Gesualdo, L., and Del Percio, C. (2016). Brain neural synchronization and functional coupling  
677 in Alzheimer's disease as revealed by resting state EEG rhythms. *Int J Psychophysiol.* 103, 88-  
678 102. <https://doi.org/10.1016/j.ijpsycho.2015.02.008>

- 679 Battiti, R. (1994). Using mutual information for selecting features in supervised neural net learning.  
680 IEEE Trans Neural Netw. 5, 537-550. doi: 10.1109/72.298224.
- 681 Benussi, A., Cantoni, V., Cotelli, M. S., Cotelli, M., Brattini, C., Datta, A., Thomas, C., Santarnecchi,  
682 E., Pascual-Leone, A., and Borroni, B. (2021). Exposure to gamma tACS in Alzheimer's  
683 disease: A randomized, double-blind, sham-controlled, crossover, pilot study. *Brain Stimul.* 14,  
684 531-540. <https://doi.org/10.1016/j.brs.2021.03.007>
- 685 Blankertz, B., Dornhege, G., Krauledat, M., Müller, K. R., & Curio, G. (2007). The non-invasive Berlin  
686 Brain-Computer Interface: fast acquisition of effective performance in untrained subjects.  
687 *NeuroImage.* 37, 539-550. doi: 10.1016/j.neuroimage.2007.01.051.
- 688 Brainard DH (1997). The Psychophysics Toolbox. *Spat Vis.* 10:433-436.
- 689 Brunyé, T. T. (2018). Modulating Spatial Processes and Navigation via Transcranial Electrical  
690 Stimulation: A Mini Review. *Front Hum Neurosci.* 11, 649. doi: 10.3389/fnhum.2017.00649.
- 691 Biel, A. L., Sterner, E., Röhl, L., & Sauseng, P. (2021). Modulating verbal working memory with  
692 fronto-parietal transcranial electric stimulation at theta frequency: Does it work? *European*  
693 *Journal of Neuroscience*, 1– 21. <https://doi.org/10.1111/ejn.15563>
- 694 Chung, Fan RK, and Fan Chung Graham. Spectral graph theory. No. 92. American Mathematical  
695 Soc., 1997
- 696 Cover, T. M. (1999). Elements of information theory. John Wiley & Sons.
- 697 Grover, S., Nguyen, J. A., Viswanathan, V., & Reinhart, R. M. (2021). High-frequency  
698 neuromodulation improves obsessive-compulsive behavior. *Nat Med.* 27, 232-238. doi:  
699 10.1038/s41591-020-01173-w.
- 700 Hoy, K. E., Bailey, N., Arnold, S., Windsor, K., John, J., Daskalakis, Z. J., Fitzgerald, P. B. (2015).  
701 The effect of  $\gamma$ -tACS on working memory performance in healthy controls. *Brain Cogn.* 101,  
702 51-56. doi: 10.1016/j.bandc.2015.11.002.
- 703 Kirchner, W. K. (1958). Age Differences in Short-Term Retention of Rapidly Changing Information.  
704 *J Exp Psychol.* 55, 352-358. doi: 10.1037/h0043688.
- 705 Klink, K., Peter, J., Wyss, P., and Klöppel, S. (2020). Transcranial Electric Current Stimulation  
706 During Associative Memory Encoding: Comparing tACS and tDCS Effects in Healthy Aging.  
707 *Front Aging Neurosci.* 12, 66. <https://doi.org/10.3389/fnagi.2020.00066>
- 708 Koenig, T., Prichep, L., Dierks, T., Hubl, D., Wahlund, L. O., John, E. R., and Jelic, V. (2005).  
709 Decreased EEG synchronization in Alzheimer's disease and mild cognitive  
710 impairment. *Neurobiol Aging.* 26, 165-171. doi: 10.1016/j.neurobiolaging.2004.03.008.

- 711 Krebs, C., Peter, J., Wyss, P., Brem, A. K., and Klöppel, S. (2021). Transcranial electrical  
712 stimulation improves cognitive training effects in healthy elderly adults with low cognitive  
713 performance. *Clin Neurophysiol.* 132, 1254-1263. <https://doi.org/10.1016/j.clinph.2021.01.034>
- 714 Li, S. C., Lindenberger, U., and Sikström, S. (2001). Aging cognition: from neuromodulation to  
715 representation. *Tren Cogn Sci.* 5, 479-486. doi: 10.1016/s1364-6613(00)01769-1.
- 716 Misselhorn, J., Göschl, F., Higgen, F. L., Hummel, F. C., Gerloff, C., and Engel, A. K. (2020).  
717 Sensory capability and information integration independently explain the cognitive status of  
718 healthy older adults. *Sci Rep.* 10. <https://doi.org/10.1038/s41598-020-80069-8>
- 719 Pahor, A., and Jaušovec, N. (2018). The effects of theta and gamma tacs on working memory and  
720 electrophysiology. *Front Hum Neurosci.* 11:651. <https://doi.org/10.3389/fnhum.2017.00651>
- 721 Pelli DG (1997) The Video Toolbox software for visual psychophysics: trians- forming numbers into  
722 movies. *Spat Vis.* 10:437-442.
- 723 Pfurtscheller, G., and Neuper, C. (2001). Motor imagery and direct brain-computer communication.  
724 *Proceedings of the IEEE.* 89, 1123-1134.
- 725 Reinhart, R. M. G., and Nguyen, J. A. (2019). Working memory revived in older adults by  
726 synchronizing rhythmic brain circuits. *Nat Neurosci.* 22, 820-827.  
727 <https://doi.org/10.1038/s41593-019-0371-x>
- 728 Riddle, J., McFerren, A., and Frohlich, F. (2021). Causal role of cross-frequency coupling in distinct  
729 components of cognitive control. *Prog Neurobiol.* 202, 102033. doi:  
730 10.1016/j.pneurobio.2021.102033.
- 731 Rombouts, S. A., Barkhof, F., Goekoop, R., Stam, C. J., and Scheltens, P. (2005). Altered resting  
732 state networks in mild cognitive impairment and mild Alzheimer's disease: an fMRI study. *Hum*  
733 *Brain Mapp.* 26, 231-239. <https://doi.org/10.1002/hbm.20160>
- 734 Timme, Nicholas M., and Christopher Lapish. "A tutorial for information theory in neuroscience."  
735 *eneuro* 5.3 (2018).
- 736 Vandergheynst P. Convolutional neural networks on graphs with fast localized spectral filtering  
737 Veličković P, Cucurull G, Casanova A, et al. Graph attention networks [J]. arXiv preprint  
738 arXiv:1710.10903, 2017
- 739 Vosskuhl, J., Huster, R. J., and Herrmann, C. S. (2015). Increase in short-term memory capacity  
740 induced by down-regulating individual theta frequency via transcranial alternating current  
741 stimulation. *Front Human Neurosci.* 9, 257. doi: 10.3389/fnhum.2015.00257.

742 Wang, P., Göschl, F., Friese, U., König, P., and Engel, A. K. (2019) Long-range functional coupling  
743 predicts performance: Oscillatory EEG networks in multisensory processing. *Neuroimage* 196,  
744 114–125. doi: 10.1016/j.neuroimage.2019.04.001.

745 Zaehle, T., Rach, S., and Herrmann, C. S. (2010). Transcranial alternating current stimulation  
746 enhances individual alpha activity in human EEG. *PloS one*, 5, e13766. doi:  
747 10.1371/journal.pone.0013766.

748

749

750

751

752

753

754

755

756

757

758

759

760

761

762

763

764

765

766

767

768

769

770

771

772

773

774 **11 Tables**

775

776 **Table 1 The analysis results of theta and alpha in prefrontal and frontal regions**

| Frequency           | Channel | Main effect                                      | Pairwise comparisons                                         |
|---------------------|---------|--------------------------------------------------|--------------------------------------------------------------|
| Theta<br>(4 ~ 8 Hz) | Fp1     | Block(block2>block1,<br>block3>block1, $p<.05$ ) | /                                                            |
|                     | Fp2     | Block(block2>block1,<br>block3>block1, $p<.05$ ) | For four-back, block3>block1<br>( $p<.05$ ) in the LP group  |
|                     | F3      | Block(block2>block1,<br>block3>block1, $p<.05$ ) | For three-back, block3>block1<br>( $p<.05$ ) in the LP group |
|                     | F4      | /                                                | /                                                            |
| Alpha<br>(9~12 Hz)  | Fp1     | /                                                | /                                                            |
|                     | Fp2     | Block(block3>block1, $p<.05$ )                   | For three-back, block3>block1<br>( $p<.05$ ) in the LP group |
|                     | F3      | /                                                | /                                                            |
|                     | F4      | /                                                | /                                                            |

777

778 **Table 2 The largest MI values in each frequency bands and the corresponding components**

| Test       | Component<br>(CSP) | Frequency band             | MI            |
|------------|--------------------|----------------------------|---------------|
| Three-back | CSP3               | $\theta$                   | 0.2677        |
|            | <b>CSP1</b>        | <b><math>\alpha</math></b> | <b>0.3264</b> |
|            | CSP0               | $\beta$                    | 0.1241        |
|            | CSP0               | $\gamma$                   | 0.1436        |
| Four-back  | <b>CSP2</b>        | <b><math>\theta</math></b> | <b>0.2808</b> |
|            | CSP3               | $\alpha$                   | 0.2636        |
|            | CSP0               | $\beta$                    | 0.1395        |
|            | CSP0               | $\gamma$                   | 0.1921        |

779 Abbreviations: CSP, common spatial pattern; MI,

780

781 **Table 3 The analysis results of 4 Hz, 5 Hz, 6 Hz, 7 Hz, and 8 Hz in prefrontal**

| Channel | Frequency | Main effect                                   | Pairwise comparisons                                                                                                   |
|---------|-----------|-----------------------------------------------|------------------------------------------------------------------------------------------------------------------------|
| Fp1     | 4 Hz      | Block(block2>block1, $p<.05$ )                | /                                                                                                                      |
|         | 5 Hz      | Block(block2>block1, block3>block1, $p<.05$ ) | /                                                                                                                      |
|         | 6 Hz      | Block(block2>block1, block3>block1, $p<.05$ ) | /                                                                                                                      |
|         | 7 Hz      | Block(block2>block1, block3>block1, $p<.05$ ) | /                                                                                                                      |
|         | 8 Hz      | Block(block2>block1, $p<.05$ )                | /                                                                                                                      |
| Fp2     | 4 Hz      | Block(block3>block1, $p<.05$ )                | /                                                                                                                      |
|         | 5 Hz      | Block(block3>block1, $p<.05$ )                | /                                                                                                                      |
|         | 6 Hz      | Block(block2>block1, block3>block1, $p<.05$ ) | For three-back, block3>block1 ( $p<.05$ ) in the HP group,<br>For four-back, block3>block1 ( $p<.05$ ) in the LP group |
|         | 7 Hz      | Block(block2>block1, block3>block1, $p<.05$ ) | For three-back, block3>block1 ( $p<.05$ ) in the HP group,<br>For four-back, block3>block1 ( $p<.05$ ) in the LP group |
|         | 8 Hz      | Block(block2>block1, block3>block1, $p<.05$ ) | For three-back, block3>block1 ( $p<.05$ ) in the LP group,<br>For four-back, block3>block1 ( $p<.05$ ) in the LP group |

782

783 **Table 4 The mutual information between 4 Hz, 5 Hz, 6 Hz, 7 Hz, and 8 Hz power and working**  
 784 **memory performance in the two selected regions**

| Channel<br>Frequency (Hz) | Fp1   | Fp2   |
|---------------------------|-------|-------|
| 4                         | 0     | 0.002 |
| 5                         | 0.006 | 0     |
| 6                         | 0     | 0.003 |
| 7                         | 0.002 | 0.003 |
| 8                         | 0.009 | 0.012 |

785

786 **12 Figure legends**

787

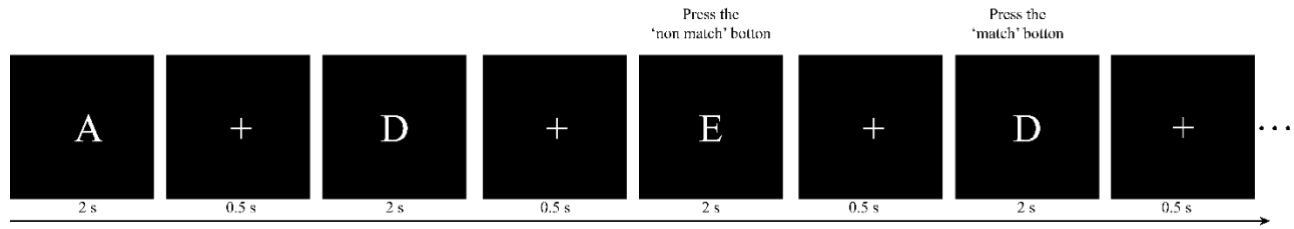

788 **Figure 1 Illustration of the two-back task paradigm in this study**

789 For the first two letters, participants were not required to press buttons, but keep the letters in their  
 790 mind instead. Subsequently, for each letter, participants were required to determine whether the  
 791 current letter was the same as the previous. In this case, the third letter should be compared with the  
 792 first (“E” vs. “A”: non-match) and the fourth should be compared with the second one (“D” vs. “D”:  
 793 match).

794

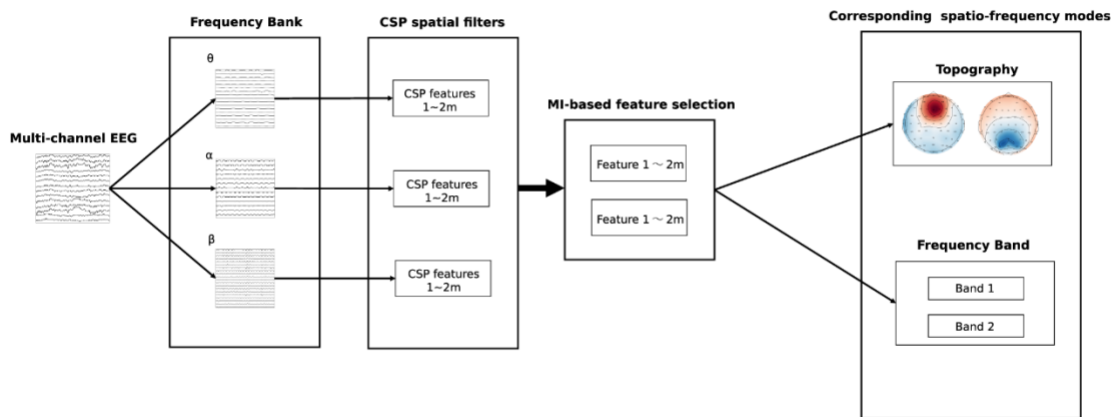

795 **Figure 2 The workflow of filter bank common spatial pattern-based spatio-frequency mode**  
 796 **selection**

797 We first filtered the raw electroencephalogram into three frequency bands and then performed spatial  
 798 filtering to obtain the common spatial pattern (CSP) features. Based on the mutual information, we  
 799 selected the two most discriminate features and determined their associated spatio-frequency modes.

800

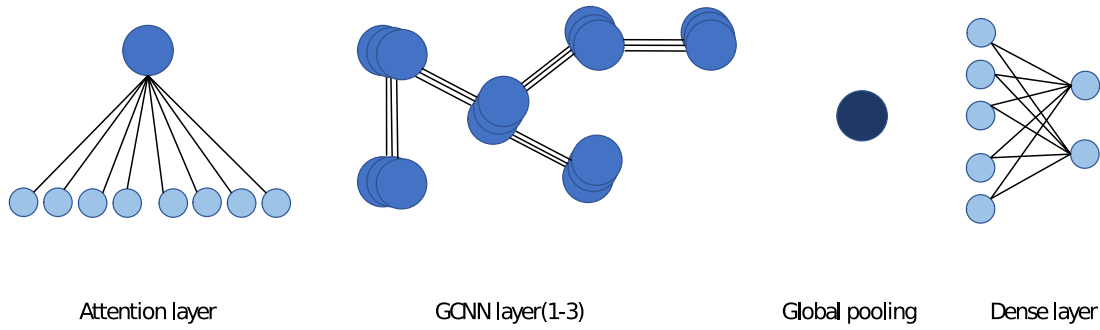

801

802 **Figure 3 The architecture of the attention based GCNN.**

803 The network consists of an attention layer, three GCNN layers, a global pooling layer, and a dense  
804 layer. The graph attention mechanism in the first layer learns the dynamic adjacent matrix and the  
805 graph features.

806



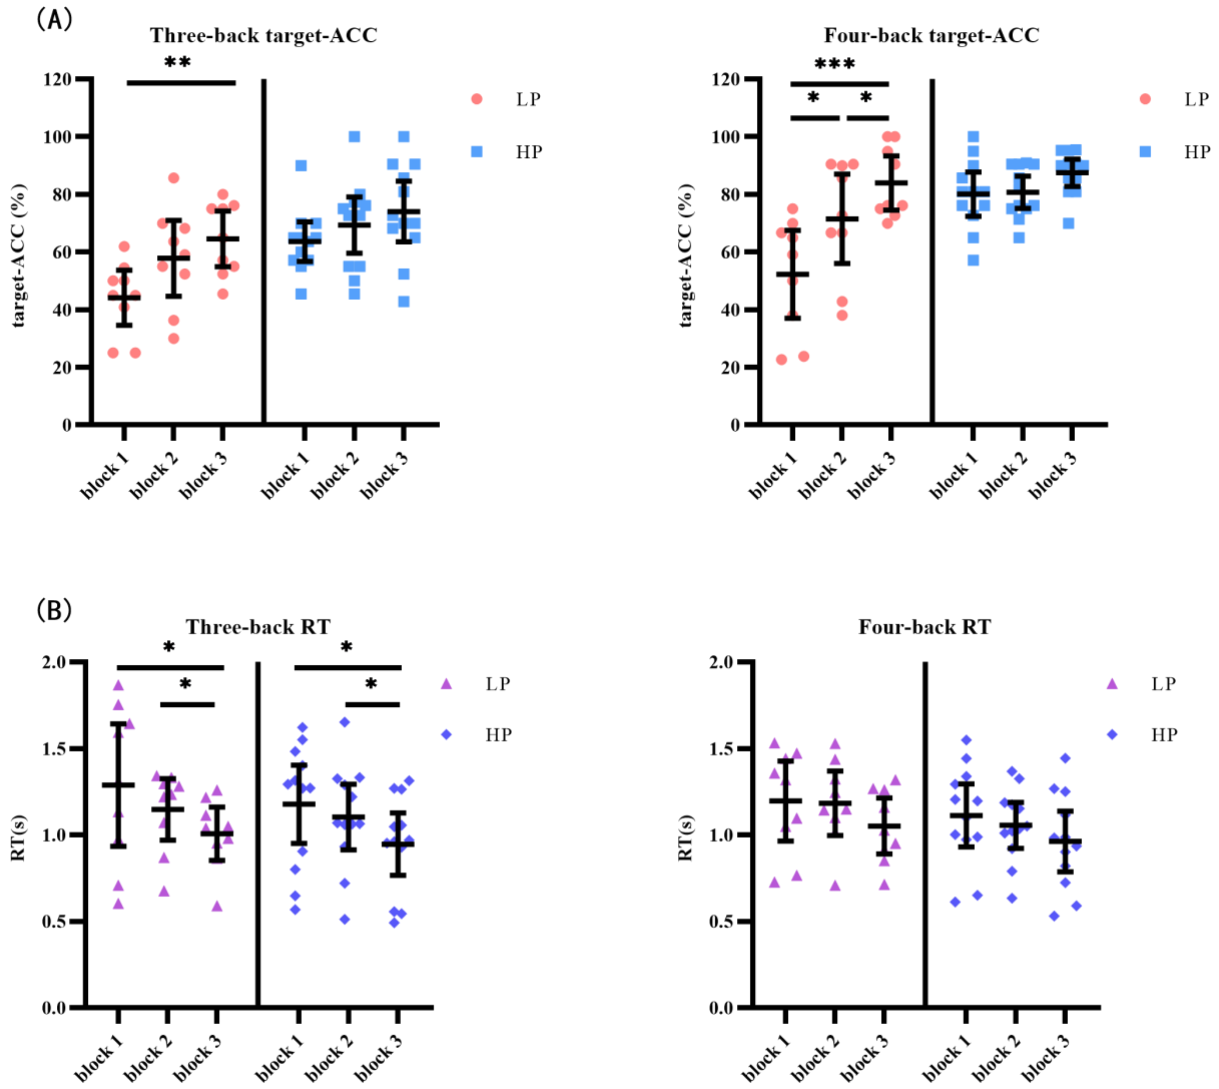

807

808 **Figure 4 Target-ACC and RT of each group for each back and each block in experiment 1**

809 (A) Scatterplots with individual data points of target-ACC in three-back and four-back tasks. (B)

810 Scatterplots with individual data points of RT in three-back and four-back tasks. Error bars are 95%-  
811 confidence intervals around the estimates.

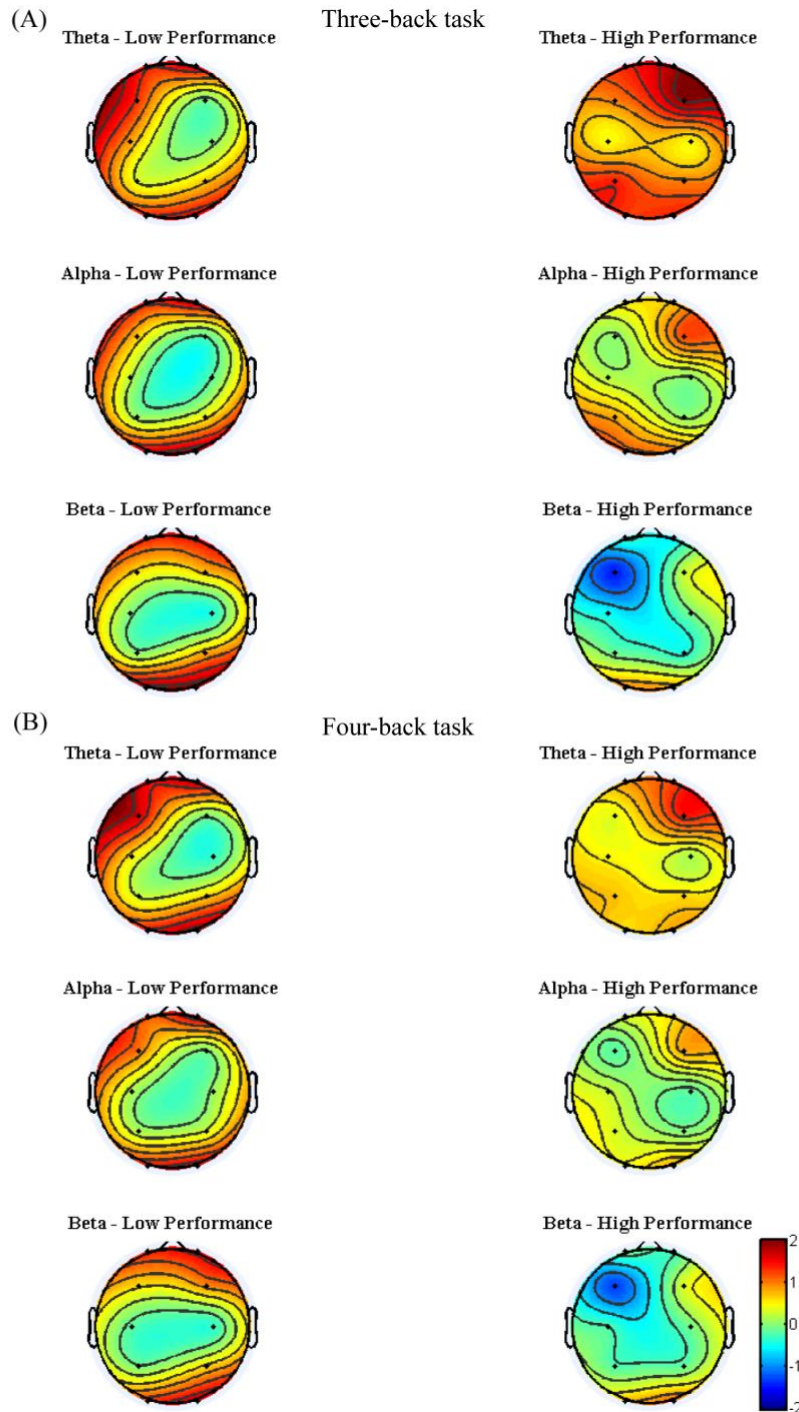

812

813 **Figure 5 Event-related synchronization from block 1 to block 3 of each group for each band**  
814 **and each back in experiment 1**

815 (A) The power change from block 1 to block 3 in three-back task. (B) The power change from block  
816 1 to block 3 in four-back task. The more tend to red, the more positive changes. The more tend to  
817 blue, the more negative changes. The color central region for each group and each frequency band  
818 tends to be green, suggesting that the power of central region tend to remain unchanged among  
819 practices.

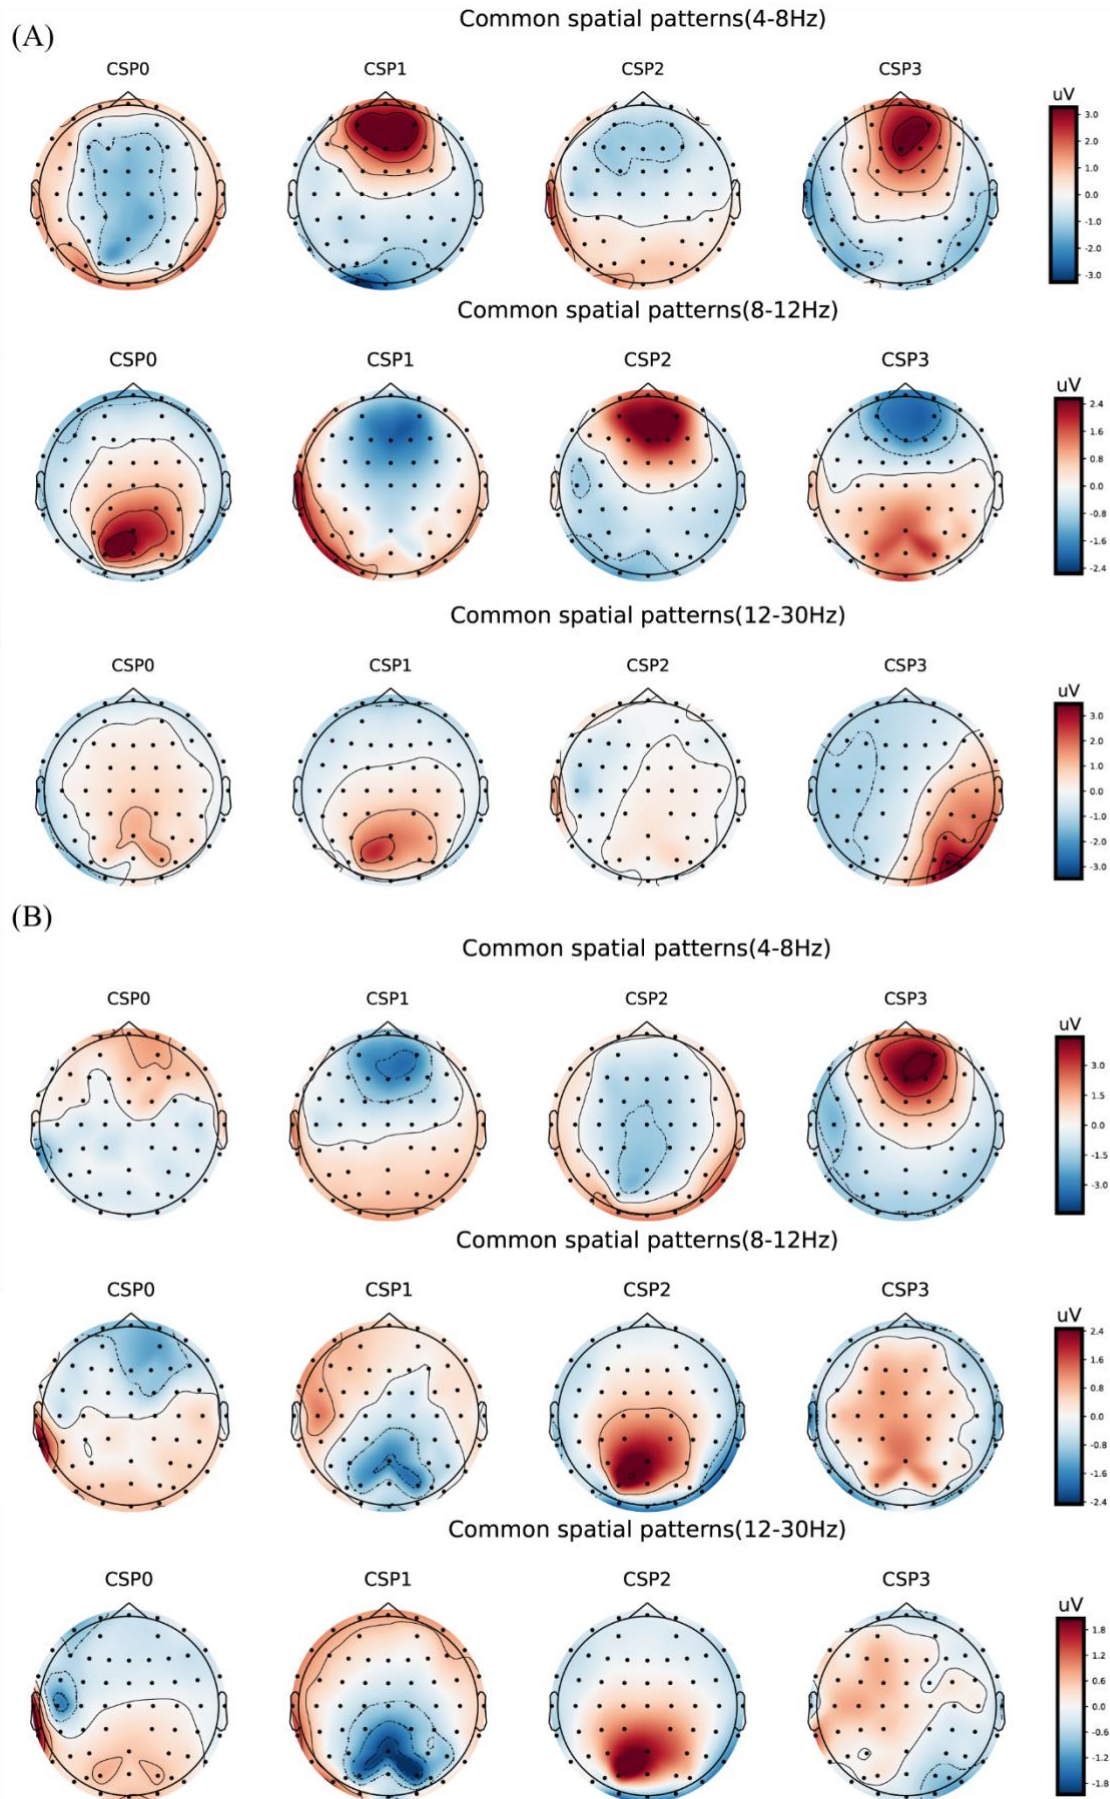

821 **Figure 6 Electroencephalogram topography showing the spatial distribution of the most**  
 822 **discriminate features and the associated frequency bands**

823 (A) Electroencephalogram topography of three-back task. From top to bottom, each row displays the  
 824 most important spatio-frequency modes for the theta, alpha, and beta bands, respectively. (B)  
 825 Electroencephalogram topography of four-back task.

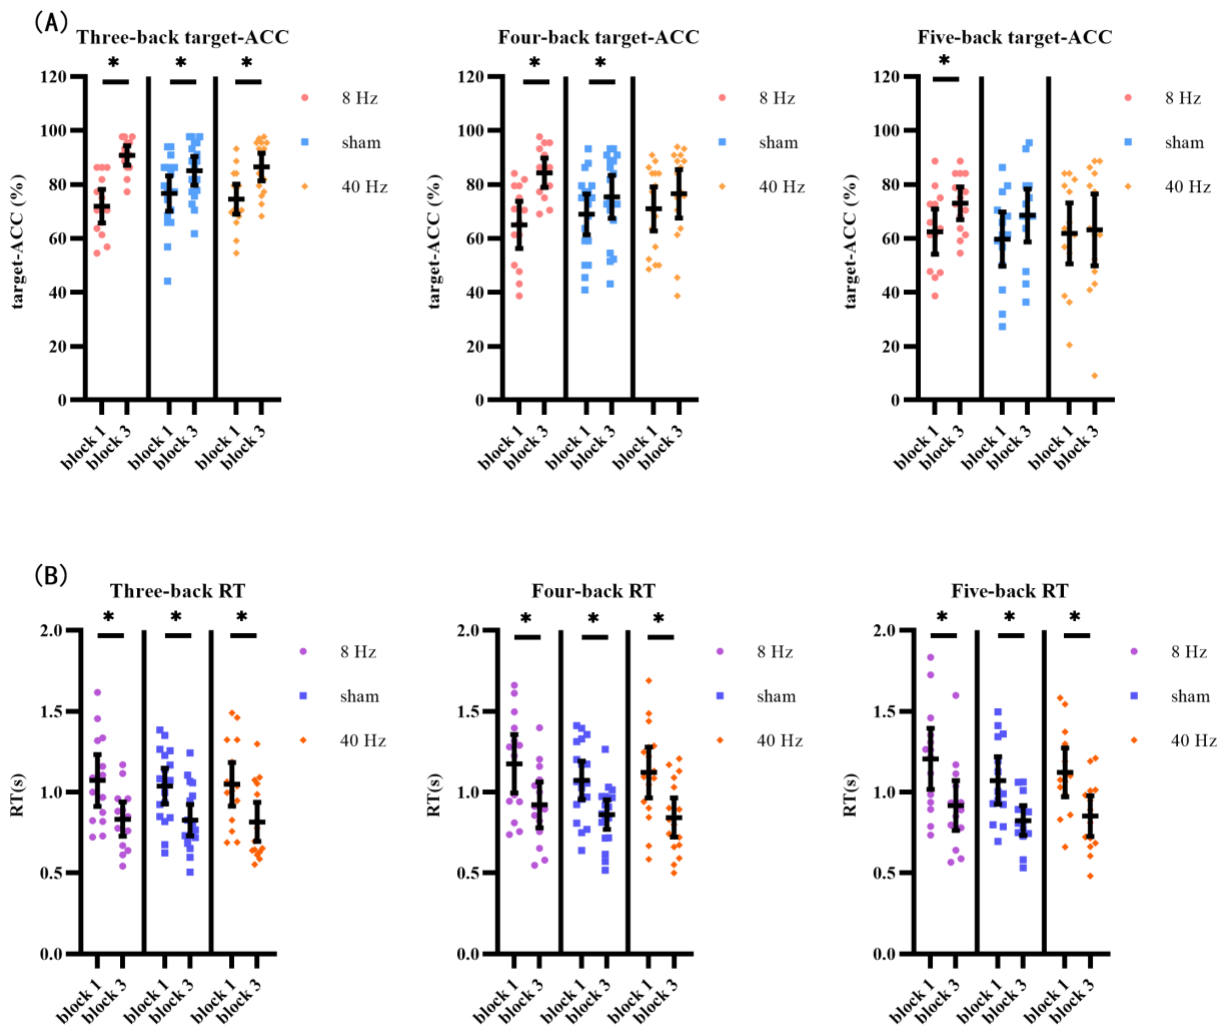

826 **Figure 7 Target-ACC and RT of each group for each back and each block in experiment 2**

827 (A) Scatterplots with individual data points of target-ACC in three-back, four-back, and five-back  
 828 tasks. (B) Scatterplots with individual data points of RT in three-back, four-back, and five-back tasks.  
 829 Error bars are 95%-confidence intervals around the estimates.

830

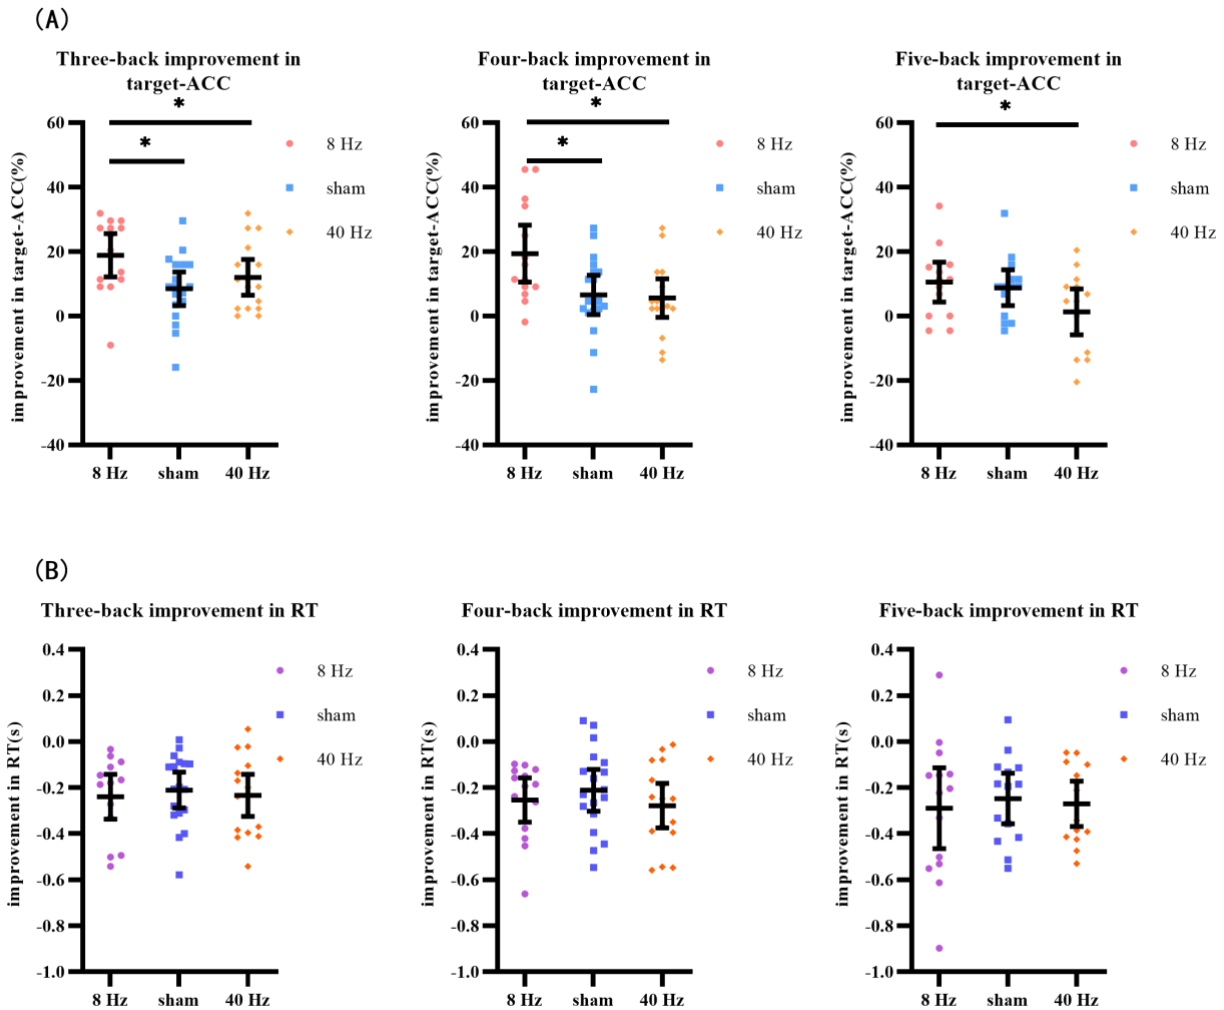

831

832 **Figure 8 Improvement in target-ACC and RT of each group for each back in experiment 2**

833 (A) Scatterplots with individual data points of improvement in target-ACC for three-back, four-back,  
834 and five-back tasks. (B) Scatterplots with individual data points of improvement in RT for three-  
835 back, four-back, and five-back tasks. Error bars are 95%-confidence intervals around the estimates.

836

837

838

839

840

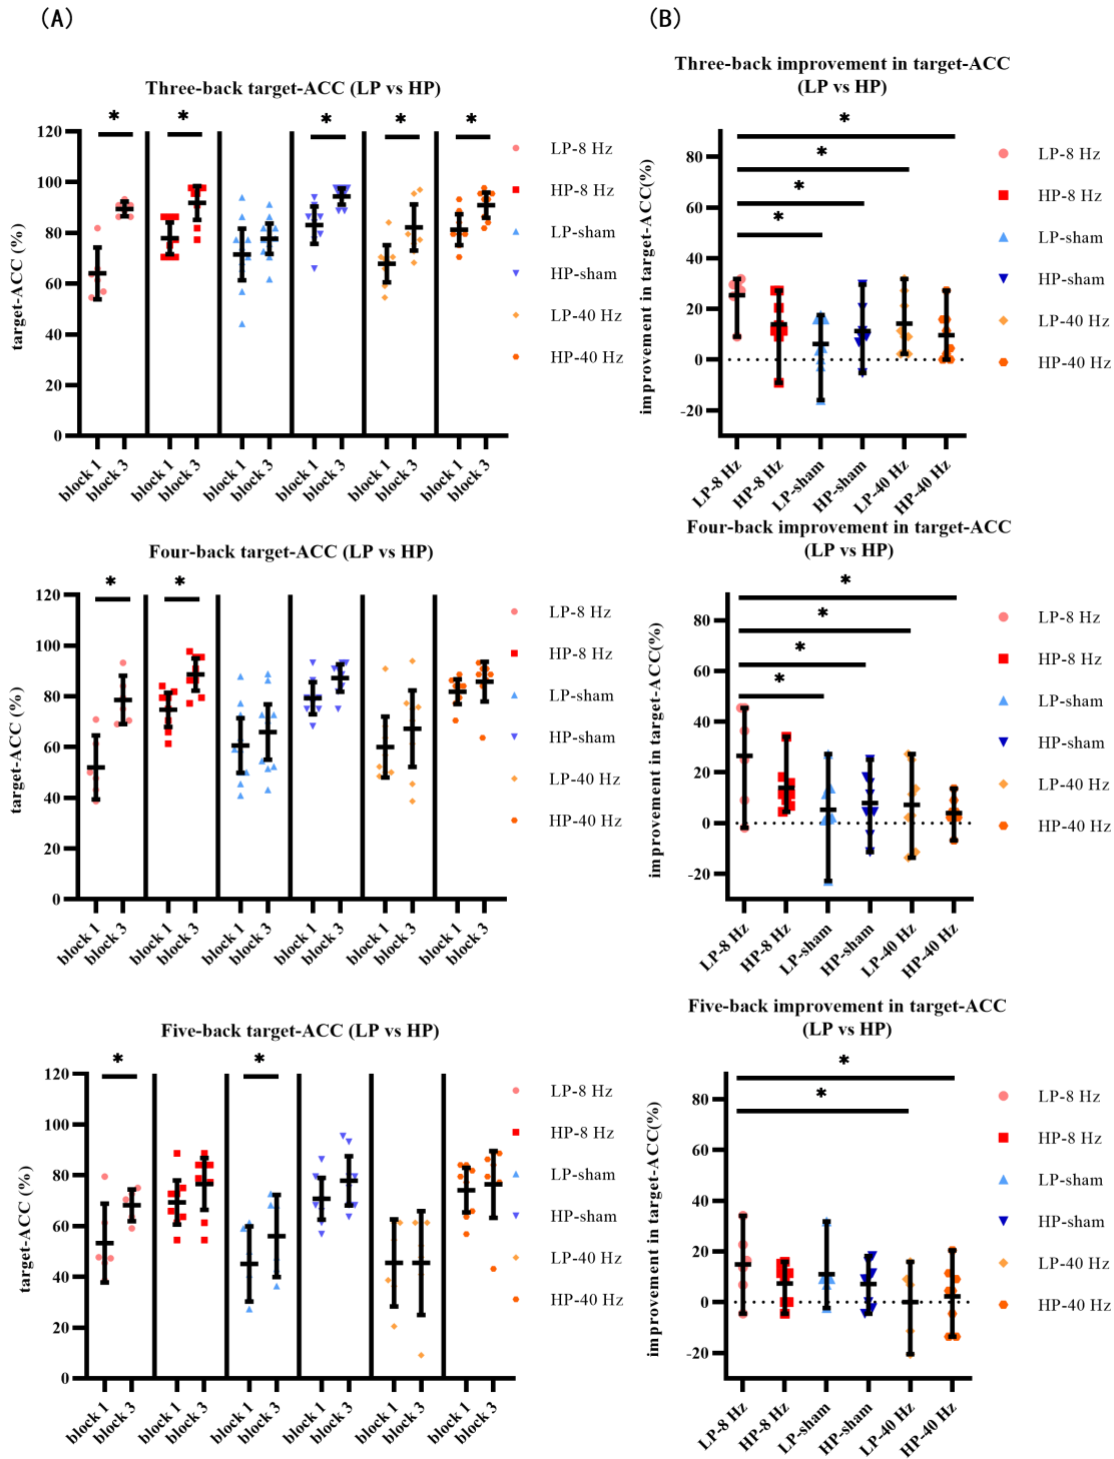

841

842 **Figure 9 Further analysis result of LP and HP in experiment 2**

843 (A) Scatterplots with individual data points of target-ACC for three-back, four-back, and five-back  
 844 tasks. (B) Scatterplots with individual data points of improvement in target-ACC for three-back,  
 845 four-back, and five-back tasks. Error bars are 95%-confidence intervals around the estimates.

846
